# Supplementary material
Source: PubMed Central journal article supplement (PMC6093801)
Supplement: NIHMS951162-supplement-supplement_1.pdf [file NIHMS951162-supplement-supplement_1.pdf]

**eTable1. Associations of cardiorespiratory fitness (CRF) with child cardiometabolic risk factors and biomarkers of endothelial function by sex.\* HCHS/SOL Youth (n=1380)**

| Cardiovascular risk factor  | Continuous           |         | CRF Quartile 2       | CRF Quartile 3       | CRF Quartile 4       | P-interaction |
|-----------------------------|----------------------|---------|----------------------|----------------------|----------------------|---------------|
|                             | Beta (95% CI) ‡      | P       | Beta (95% CI) †      | Beta (95% CI) †      | Beta (95% CI) †      |               |
| <b>Girls</b>                |                      |         |                      |                      |                      |               |
| BMI Z-score                 | -0.50 (-0.67, -0.33) | <0.0001 | -0.40 (-0.70, -0.11) | -0.57 (-0.90, -0.24) | -0.98 (-1.33, -0.63) | 0.948         |
| Waist circumference Z-score | -0.45 (-0.57, -0.33) | <0.0001 | -0.48 (-0.71, -0.25) | -0.63 (-0.89, -0.37) | -0.82 (-1.05, -0.58) | 0.240         |
| % body fat, %               | -4.8 (-6.1, -3.6)    | <0.0001 | -5.0 (-7.1, -2.9)    | -6.9 (-9.2, -4.6)    | -9.3 (-11.8, -6.9)   | 0.060         |
| SBP, percentile             | -4.5 (-7.3, -1.8)    | 0.0015  | 2.2 (-3.5, 7.8)      | -2.1 (-8.1, 3.9)     | -9.7 (-15.6, -3.7)   | 0.427         |
| DBP, percentile             | -6.7 (-9.1, -4.3)    | <0.0001 | -4.0 (-9.2, 1.1)     | -8.8 (-14.7, -2.8)   | -11.8 (-16.9, -6.7)  | 0.462         |
| FPG, mg/dL                  | -0.6 (-1.6, 0.3)     | 0.2075  | -1.2 (-2.9, 0.5)     | -0.7 (-2.4, 1.0)     | -1.3 (-3.4, 0.8)     | 0.897         |
| Glycated hemoglobin A1c, %  | -0.04 (-0.08, 0.00)  | 0.0445  | -0.09 (-0.16, -0.01) | -0.06 (-0.14, 0.02)  | -0.06 (-0.14, 0.03)  | 0.602         |
| log(HOMA-IR)                | -0.27 (-0.36, -0.19) | <0.0001 | -0.37 (-0.54, -0.20) | -0.36 (-0.53, -0.19) | -0.49 (-0.68, -0.30) | 0.264         |
| Total cholesterol, mg/dL    | -3.6 (-6.6, -0.5)    | 0.0209  | -2.1 (-8.6, 4.3)     | -4.4 (-11.4, 2.5)    | -9.5 (-15.8, -3.1)   | 0.386         |
| HDL, mg/dL                  | 1.8 (0.6, 3.1)       | 0.0036  | 2.1 (-0.2, 4.4)      | 2.0 (-0.6, 4.6)      | 3.0 (0.3, 5.8)       | 0.572         |
| LDL, mg/dL                  | -3.0 (-5.9, -0.1)    | 0.0428  | -2.2 (-8.1, 3.7)     | -3.0 (-9.4, 3.4)     | -8.1 (-13.9, -2.2)   | 0.539         |
| log(Triglycerides, mg/dL)   | -0.15 (-0.22, -0.07) | 0.0001  | -0.12 (-0.25, 0.00)  | -0.19 (-0.31, -0.06) | -0.29 (-0.44, -0.14) | 0.106         |
| log(CRP, mg/dL)             | -0.43 (-0.58, -0.28) | <0.0001 | -0.51 (-0.79, -0.23) | -0.66 (-0.96, -0.35) | -0.79 (-1.13, -0.45) | 0.579         |
| Adiponectin, ug/mL          | 0.81 (0.34, 1.27)    | 0.0008  | 0.82 (-0.12, 1.75)   | 0.59 (-0.52, 1.70)   | 1.41 (0.26, 2.57)    | 0.359         |
| log(PAI-1, ng/mL)           | -0.24 (-0.34, -0.13) | <0.0001 | -0.39 (-0.59, -0.20) | -0.34 (-0.56, -0.13) | -0.48 (-0.72, -0.24) | <b>0.016</b>  |
| log(e-selectin, ng/mL)      | -0.08 (-0.13, -0.03) | 0.0032  | -0.08 (-0.17, 0.01)  | -0.11 (-0.21, 0.00)  | -0.15 (-0.25, -0.04) | 0.798         |
| <b>Boys</b>                 |                      |         |                      |                      |                      |               |
| BMI Z-score                 | -0.49 (-0.63, -0.35) | <0.0001 | -0.37 (-0.66, -0.08) | -0.76 (-1.06, -0.47) | -1.03 (-1.33, -0.74) |               |
| Waist circumference Z-score | -0.56 (-0.70, -0.42) | <0.0001 | -0.45 (-0.78, -0.13) | -0.85 (-1.16, -0.54) | -1.11 (-1.41, -0.82) |               |
| % body fat, %               | -6.6 (-8.0, -5.1)    | <0.0001 | -5.9 (-9.5, -2.3)    | -10.8 (-14.1, -7.5)  | -13.8 (-16.9, -10.7) |               |
| SBP, percentile             | -2.8 (-6.0, 0.5)     | 0.0958  | -2.9 (-10.9, 5.1)    | -3.2 (-11.4, 5.0)    | -9.4 (-16.4, -2.5)   |               |
| DBP, percentile             | -5.3 (-8.3, -2.3)    | 0.0005  | -3.1 (-10.0, 3.8)    | -8.4 (-14.3, -2.4)   | -12.3 (-18.3, -6.3)  |               |
| FPG, mg/dL                  | -0.7 (-1.5, 0.0)     | 0.0662  | -0.3 (-1.8, 1.3)     | -1.5 (-3.1, 0.1)     | -1.5 (-3.1, 0.0)     |               |
| Glycated hemoglobin A1c, %  | -0.03 (-0.06, 0.01)  | 0.1539  | -0.06 (-0.15, 0.03)  | -0.10 (-0.19, -0.01) | -0.05 (-0.13, 0.04)  |               |
| log(HOMA-IR)                | -0.34 (-0.41, -0.26) | <0.0001 | -0.26 (-0.44, -0.08) | -0.41 (-0.61, -0.22) | -0.69 (-0.85, -0.53) |               |
| Total cholesterol, mg/dL    | -5.6 (-8.9, -2.2)    | 0.0012  | -3.9 (-11.8, 3.9)    | -5.9 (-15.0, 3.2)    | -9.9 (-17.7, -2.0)   |               |
| HDL, mg/dL                  | 2.4 (1.0, 3.8)       | 0.0009  | 3.4 (0.2, 6.5)       | 3.8 (0.5, 7.0)       | 6.0 (3.0, 9.0)       |               |
| LDL, mg/dL                  | -4.2 (-6.9, -1.5)    | 0.0028  | -3.6 (-10.1, 2.8)    | -5.2 (-12.7, 2.2)    | -8.0 (-14.4, -1.7)   |               |
| log(Triglycerides, mg/dL)   | -0.23 (-0.30, -0.16) | <0.0001 | -0.19 (-0.35, -0.03) | -0.29 (-0.46, -0.11) | -0.47 (-0.62, -0.33) |               |
| log(CRP, mg/dL)             | -0.48 (-0.63, -0.34) | <0.0001 | -0.43 (-0.80, -0.06) | -0.77 (-1.13, -0.41) | -1.01 (-1.35, -0.67) |               |
| Adiponectin, ug/mL          | 0.50 (0.01, 1.00)    | 0.0466  | 0.66 (-0.60, 1.91)   | 1.09 (0.00, 2.18)    | 1.45 (0.52, 2.37)    |               |
| log(PAI-1, ng/mL)           | -0.39 (-0.49, -0.28) | <0.0001 | -0.18 (-0.39, 0.04)  | -0.43 (-0.64, -0.21) | -0.75 (-0.96, -0.54) |               |
| log(e-selectin, ng/mL)      | -0.08 (-0.14, -0.03) | 0.0032  | -0.04 (-0.17, 0.08)  | -0.05 (-0.15, 0.06)  | -0.18 (-0.29, -0.07) |               |

\*Estimates derived from models with terms for the interaction between cardiorespiratory fitness (in quartile and continuous forms) and age, sex, or obesity status, while adjusting for age, sex, field center, national background, birth in US mainland, annual household income, and parent education level; P-values derived from models using the continuous cardiorespiratory fitness variable; presented p-values were derived from models in which cardiorespiratory fitness was treated as a continuous variable.

†Lowest quartile (Q1) is reference category; ‡Each 10 ml/kg/min increment; **Boldface** signifies statistically significant interaction between cardiorespiratory fitness and sex.

BMI, body mass index; CRP, C-reactive protein; DBP, diastolic blood pressure; FPG, fasting plasma glucose; HDL, high density lipoprotein; HOMA-IR, homeostasis model assessment – insulin resistance; PAI-1, plasminogen activator inhibitor-1; SBP, systolic blood pressure.

**eTable2. Associations of cardiorespiratory fitness (CRF) with child cardiometabolic risk factors and biomarkers of endothelial function by age group.\* HCHS/SOL Youth (n=1380)**

| Cardiovascular risk factor   | Continuous           |         | CRF Quartile 2       | CRF Quartile 3       | CRF Quartile 4       | p-interaction |
|------------------------------|----------------------|---------|----------------------|----------------------|----------------------|---------------|
|                              | Beta (95% CI)‡       | p-value | Beta (95% CI)†       | Beta (95% CI)†       | Beta (95% CI)†       |               |
| <b>AMONG AGE 8-12 YEARS</b>  |                      |         |                      |                      |                      |               |
| BMI Z-score                  | -0.60 (-0.72, -0.47) | <0.0001 | -0.61 (-0.84, -0.38) | -0.85 (-1.11, -0.59) | -1.22 (-1.48, -0.95) | <b>0.043</b>  |
| Waist circumference Z-score  | -0.49 (-0.60, -0.39) | <0.0001 | -0.55 (-0.76, -0.33) | -0.74 (-0.96, -0.52) | -1.00 (-1.21, -0.80) | 0.851         |
| % body fat, %                | -6.1 (-7.2, -5.0)    | <0.0001 | -6.7 (-9.3, -4.2)    | -9.5 (-12.1, -7.0)   | -12.6 (-15.0, -10.2) | 0.423         |
| SBP, percentile              | -4.0 (-7.2, -0.8)    | 0.0148  | -0.3 (-6.4, 5.8)     | -7.3 (-13.6, -0.9)   | -9.0 (-15.3, -2.7)   | 0.800         |
| DBP, percentile              | -5.7 (-8.4, -3.1)    | <0.0001 | -3.2 (-8.6, 2.2)     | -9.1 (-14.4, -3.9)   | -11.8 (-17.2, -6.4)  | 0.789         |
| FPG, mg/dL                   | -0.4 (-1.3, 0.6)     | 0.4450  | -0.3 (-2.2, 1.5)     | -1.2 (-3.0, 0.6)     | -0.9 (-2.8, 1.0)     | 0.302         |
| Glycated hemoglobin A1c, %   | -0.04 (-0.08, -0.01) | 0.0228  | -0.09 (-0.16, -0.02) | -0.08 (-0.15, 0.00)  | -0.10 (-0.17, -0.02) | 0.427         |
| log(HOMA-IR)                 | -0.29 (-0.38, -0.21) | <0.0001 | -0.31 (-0.49, -0.13) | -0.41 (-0.59, -0.22) | -0.60 (-0.79, -0.42) | 0.658         |
| Total cholesterol, mg/dL     | -4.2 (-7.7, -0.7)    | 0.0189  | -1.6 (-8.6, 5.5)     | -4.5 (-11.8, 2.8)    | -8.4 (-15.8, -0.9)   | 0.740         |
| HDL, mg/dL                   | 2.3 (0.9, 3.7)       | 0.0015  | 1.3 (-1.4, 3.9)      | 2.1 (-1.0, 5.2)      | 4.3 (1.3, 7.3)       | 0.728         |
| LDL, mg/dL                   | -3.6 (-6.7, -0.5)    | 0.0232  | -0.5 (-7.0, 6.0)     | -3.1 (-9.6, 3.4)     | -6.8 (-13.4, -0.2)   | 0.995         |
| log(Triglycerides, mg/dL)    | -0.19 (-0.25, -0.12) | <0.0001 | -0.12 (-0.24, 0.00)  | -0.20 (-0.35, -0.06) | -0.38 (-0.52, -0.23) | 0.877         |
| log(CRP, mg/dL)              | -0.45 (-0.58, -0.32) | <0.0001 | -0.56 (-0.85, -0.27) | -0.66 (-0.95, -0.37) | -0.92 (-1.22, -0.61) | 0.844         |
| Adiponectin, ug/mL           | 0.93 (0.43, 1.42)    | 0.0003  | 0.82 (-0.01, 1.66)   | 0.90 (-0.14, 1.93)   | 1.95 (0.97, 2.94)    | 0.101         |
| log(PAI-1, ng/mL)            | -0.35 (-0.46, -0.24) | <0.0001 | -0.38 (-0.59, -0.17) | -0.50 (-0.71, -0.28) | -0.73 (-0.95, -0.50) | 0.328         |
| log(e-selectin, ng/mL)       | -0.12 (-0.17, -0.07) | <0.0001 | -0.13 (-0.23, -0.04) | -0.17 (-0.26, -0.08) | -0.25 (-0.36, -0.15) | <b>0.025</b>  |
| <b>AMONG AGE 13-16 YEARS</b> |                      |         |                      |                      |                      |               |
| BMI Z-score                  | -0.39 (-0.57, -0.21) | <0.0001 | -0.14 (-0.53, 0.25)  | -0.46 (-0.82, -0.11) | -0.77 (-1.15, -0.39) |               |
| Waist circumference Z-score  | -0.51 (-0.66, -0.36) | <0.0001 | -0.36 (-0.72, 0.00)  | -0.72 (-1.04, -0.41) | -0.95 (-1.26, -0.64) |               |
| % body fat, %                | -5.3 (-6.9, -3.8)    | <0.0001 | -3.5 (-6.8, -0.1)    | -7.7 (-10.5, -5.0)   | -10.5 (-13.5, -7.5)  |               |
| SBP, percentile              | -3.4 (-6.4, -0.4)    | 0.0273  | 0.0 (-6.4, 6.4)      | 3.2 (-4.3, 10.7)     | -9.2 (-15.7, -2.7)   |               |
| DBP, percentile              | -6.3 (-9.2, -3.4)    | <0.0001 | -4.1 (-10.2, 2.0)    | -7.9 (-14.3, -1.5)   | -12.6 (-18.7, -6.5)  |               |
| FPG, mg/dL                   | -1.0 (-1.7, -0.2)    | 0.0127  | -1.3 (-2.8, 0.3)     | -1.0 (-2.7, 0.7)     | -2.0 (-3.8, -0.2)    |               |
| Glycated hemoglobin A1c, %   | -0.02 (-0.06, 0.02)  | 0.2429  | -0.06 (-0.15, 0.04)  | -0.09 (-0.19, 0.00)  | 0.00 (-0.10, 0.09)   |               |
| log(HOMA-IR)                 | -0.32 (-0.39, -0.25) | <0.0001 | -0.33 (-0.53, -0.13) | -0.35 (-0.52, -0.17) | -0.62 (-0.79, -0.46) |               |
| Total cholesterol, mg/dL     | -5.1 (-8.7, -1.5)    | 0.0052  | -4.3 (-11.3, 2.7)    | -5.7 (-14.9, 3.6)    | -10.6 (-18.2, -2.9)  |               |
| HDL, mg/dL                   | 1.9 (0.5, 3.3)       | 0.0071  | 4.1 (0.8, 7.4)       | 3.2 (0.4, 6.0)       | 4.9 (1.9, 7.9)       |               |
| LDL, mg/dL                   | -3.6 (-6.4, -0.8)    | 0.0111  | -5.5 (-11.1, 0.1)    | -5.0 (-12.6, 2.5)    | -8.9 (-15.0, -2.9)   |               |
| log(Triglycerides, mg/dL)    | -0.20 (-0.27, -0.12) | <0.0001 | -0.18 (-0.38, 0.03)  | -0.25 (-0.41, -0.09) | -0.39 (-0.56, -0.23) |               |
| log(CRP, mg/dL)              | -0.47 (-0.63, -0.31) | <0.0001 | -0.35 (-0.69, -0.01) | -0.79 (-1.17, -0.41) | -0.92 (-1.28, -0.56) |               |
| Adiponectin, ug/mL           | 0.34 (-0.18, 0.86)   | 0.1946  | 0.68 (-0.77, 2.12)   | 0.77 (-0.52, 2.06)   | 0.86 (-0.32, 2.04)   |               |
| log(PAI-1, ng/mL)            | -0.28 (-0.39, -0.18) | <0.0001 | -0.21 (-0.42, 0.00)  | -0.27 (-0.48, -0.06) | -0.57 (-0.81, -0.33) |               |
| log(e-selectin, ng/mL)       | -0.04 (-0.09, 0.02)  | 0.1811  | 0.01 (-0.11, 0.13)   | 0.03 (-0.07, 0.14)   | -0.09 (-0.20, 0.02)  |               |

\*Estimates derived from models with terms for the interaction between cardiorespiratory fitness (in quartile and continuous forms) and age, sex, or obesity status, while adjusting for age, sex, field center, national background, birth in US mainland, annual household income, and parent education level; P-values derived from models using the continuous cardiorespiratory fitness variable; presented p-values were derived from models in which cardiorespiratory fitness was treated as a continuous variable.

†Lowest quartile (Q1) is reference category; ‡Each 10 ml/kg/min increment; **Boldface** signifies statistically significant interaction between cardiorespiratory fitness and age.

BMI, body mass index; CRP, C-reactive protein; DBP, diastolic blood pressure; FPG, fasting plasma glucose; HDL, high density lipoprotein; HOMA-IR, homeostasis model assessment – insulin resistance; PAI-1, plasminogen activator inhibitor-1; SBP, systolic blood pressure.

**eTable3. Associations of cardiorespiratory fitness (CRF) with child cardiometabolic risk factors and biomarkers of endothelial function, by obesity status.\* HCHS/SOL Youth (n=1380)**

| Cardiovascular risk factor               | Continuous                 |         | CRF Quartile 2             | CRF Quartile 3             | CRF Quartile 4             | p-interaction |
|------------------------------------------|----------------------------|---------|----------------------------|----------------------------|----------------------------|---------------|
|                                          | Beta (95% CI) <sup>‡</sup> | p-value | Beta (95% CI) <sup>†</sup> | Beta (95% CI) <sup>†</sup> | Beta (95% CI) <sup>†</sup> |               |
| <b>WITHOUT OBESITY (BMI %ile &lt;95)</b> |                            |         |                            |                            |                            |               |
| BMI Z-score                              | -0.18 (-0.32, -0.04)       | 0.0107  | -0.02 (-0.30, 0.25)        | -0.14 (-0.43, 0.15)        | -0.35 (-0.65, -0.04)       | 0.213         |
| Waist circumference Z-score              | -0.15 (-0.22, -0.08)       | <0.0001 | -0.05 (-0.20, 0.09)        | -0.13 (-0.30, 0.05)        | -0.26 (-0.41, -0.10)       | 0.144         |
| % body fat, %                            | -2.5 (-3.3, -1.6)          | <0.0001 | -1.8 (-3.4, -0.2)          | -3.4 (-5.0, -1.8)          | -4.9 (-6.6, -3.2)          | 0.964         |
| SBP, percentile                          | -4.0 (-6.7, -1.2)          | 0.0049  | -2.4 (-8.2, 3.4)           | -3.6 (-10.0, 2.8)          | -10.4 (-16.0, -4.8)        | 0.314         |
| DBP, percentile                          | -4.7 (-7.3, -2.2)          | 0.0003  | -3.2 (-9.0, 2.7)           | -5.8 (-11.3, -0.3)         | -9.8 (-14.8, -4.7)         | 0.808         |
| FPG, mg/dL                               | -0.6 (-1.3, 0.1)           | 0.0713  | -1.1 (-2.6, 0.4)           | -0.9 (-2.4, 0.6)           | -1.7 (-3.2, -0.2)          | 0.551         |
| Glycated hemoglobin A1c, %               | 0.00 (-0.04, 0.03)         | 0.8082  | -0.04 (-0.10, 0.03)        | -0.04 (-0.11, 0.04)        | 0.00 (-0.08, 0.08)         | 0.279         |
| log(HOMA-IR)                             | -0.17 (-0.23, -0.10)       | <0.0001 | -0.19 (-0.35, -0.03)       | -0.15 (-0.31, 0.00)        | -0.33 (-0.47, -0.18)       | 0.465         |
| Total cholesterol, mg/dL                 | -3.4 (-6.3, -0.6)          | 0.0176  | -1.4 (-7.4, 4.6)           | -3.8 (-10.9, 3.4)          | -6.7 (-13.0, -0.5)         | 0.514         |
| HDL, mg/dL                               | 0.3 (-0.7, 1.3)            | 0.5335  | 1.2 (-1.3, 3.7)            | 0.5 (-2.0, 3.0)            | 1.3 (-1.0, 3.6)            | 0.719         |
| LDL, mg/dL                               | -1.7 (-3.9, 0.6)           | 0.1468  | -0.8 (-5.7, 4.2)           | -1.5 (-7.3, 4.4)           | -3.9 (-9.0, 1.1)           | 0.359         |
| log(Triglycerides, mg/dL)                | -0.13 (-0.19, -0.06)       | 0.0001  | -0.09 (-0.25, 0.07)        | -0.16 (-0.30, -0.01)       | -0.25 (-0.40, -0.10)       | 0.466         |
| log(CRP, mg/dL)                          | -0.21 (-0.33, -0.08)       | 0.0014  | -0.24 (-0.48, 0.01)        | -0.31 (-0.59, -0.04)       | -0.41 (-0.69, -0.13)       | 0.887         |
| Adiponectin, ug/mL                       | 0.10 (-0.36, 0.56)         | 0.6630  | 0.37 (-0.77, 1.51)         | 0.04 (-1.08, 1.15)         | 0.46 (-0.54, 1.45)         | 0.205         |
| log(PAI-1, ng/mL)                        | -0.18 (-0.27, -0.10)       | <0.0001 | -0.19 (-0.36, -0.03)       | -0.16 (-0.34, 0.03)        | -0.40 (-0.59, -0.21)       | 0.215         |
| log(e-selectin, ng/mL)                   | -0.05 (-0.10, 0.00)        | 0.0527  | -0.02 (-0.11, 0.06)        | -0.01 (-0.09, 0.08)        | -0.09 (-0.18, 0.00)        | 0.264         |
| <b>WITH OBESITY (BMI %ile ≥95)</b>       |                            |         |                            |                            |                            |               |
| BMI Z-score                              | -0.09 (-0.15, -0.03)       | 0.0057  | -0.04 (-0.13, 0.05)        | -0.14 (-0.27, -0.01)       | -0.16 (-0.31, 0.00)        |               |
| Waist circumference Z-score              | -0.25 (-0.38, -0.13)       | 0.0001  | -0.17 (-0.39, 0.05)        | -0.38 (-0.63, -0.14)       | -0.39 (-0.71, -0.07)       |               |
| % body fat, %                            | -2.5 (-3.6, -1.4)          | <0.0001 | -1.8 (-4.0, 0.3)           | -3.8 (-6.1, -1.5)          | -5.6 (-8.3, -2.9)          |               |
| SBP, percentile                          | -1.3 (-5.8, 3.2)           | 0.5630  | 4.8 (-2.2, 11.7)           | -0.7 (-9.0, 7.6)           | -5.9 (-17.8, 6.1)          |               |
| DBP, percentile                          | -4.2 (-7.8, -0.5)          | 0.0262  | 0.2 (-6.0, 6.5)            | -9.6 (-17.8, -1.5)         | -7.7 (-16.9, 1.5)          |               |
| FPG, mg/dL                               | -0.2 (-1.5, 1.1)           | 0.7772  | 0.1 (-1.8, 2.0)            | -2.1 (-4.3, 0.2)           | 1.1 (-1.4, 3.6)            |               |
| Glycated hemoglobin A1c, %               | -0.03 (-0.08, 0.01)        | 0.1080  | -0.08 (-0.16, 0.01)        | -0.06 (-0.16, 0.03)        | 0.00 (-0.10, 0.09)         |               |
| log(HOMA-IR)                             | -0.13 (-0.21, -0.05)       | 0.0012  | -0.11 (-0.25, 0.03)        | -0.16 (-0.35, 0.04)        | -0.31 (-0.51, -0.11)       |               |
| Total cholesterol, mg/dL                 | -5.3 (-10.1, -0.5)         | 0.0313  | -2.8 (-11.8, 6.3)          | -2.2 (-12.3, 7.9)          | -13.3 (-23.9, -2.8)        |               |
| HDL, mg/dL                               | 0.0 (-1.6, 1.5)            | 0.9825  | -0.2 (-2.6, 2.3)           | -1.7 (-4.6, 1.3)           | 0.3 (-3.8, 4.4)            |               |
| LDL, mg/dL                               | -3.9 (-8.1, 0.4)           | 0.0763  | -1.8 (-9.4, 5.8)           | -1.8 (-10.5, 6.9)          | -9.7 (-19.0, -0.3)         |               |
| log(Triglycerides, mg/dL)                | -0.09 (-0.18, 0.00)        | 0.0414  | -0.05 (-0.17, 0.08)        | 0.02 (-0.18, 0.22)         | -0.26 (-0.47, -0.05)       |               |
| log(CRP, mg/dL)                          | -0.22 (-0.38, -0.06)       | 0.0059  | -0.12 (-0.42, 0.18)        | -0.36 (-0.78, 0.06)        | -0.56 (-0.89, -0.24)       |               |
| Adiponectin, ug/mL                       | -0.29 (-0.70, 0.12)        | 0.1702  | -0.34 (-1.10, 0.42)        | -0.26 (-1.10, 0.58)        | -0.69 (-1.66, 0.28)        |               |
| log(PAI-1, ng/mL)                        | -0.09 (-0.23, 0.05)        | 0.2037  | -0.03 (-0.27, 0.22)        | -0.19 (-0.45, 0.08)        | -0.11 (-0.52, 0.31)        |               |
| log(e-selectin, ng/mL)                   | -0.01 (-0.07, 0.05)        | 0.8265  | -0.01 (-0.11, 0.10)        | -0.01 (-0.15, 0.13)        | -0.09 (-0.25, 0.07)        |               |

\*Estimates derived from models with terms for the interaction between cardiorespiratory fitness (in quartile and continuous forms) and age, sex, or obesity status, while adjusting for age, sex, field center, national background, birth in US mainland, annual household income, and parent education level; P-values derived from models using the continuous cardiorespiratory fitness variable; presented p-values were derived from models in which cardiorespiratory fitness was treated as a continuous variable.

†Lowest quartile (Q1) is reference category; ‡Each 10 ml/kg/min increment; **Boldface** signifies statistically significant interaction between cardiorespiratory fitness and age.

BMI, body mass index; CRP, C-reactive protein; DBP, diastolic blood pressure; FPG, fasting plasma glucose; HDL, high density lipoprotein; HOMA-IR, homeostasis model assessment – insulin resistance; PAI-1, plasminogen activator inhibitor-1; SBP, systolic blood pressure.
